# Supplementary material
Source: publisher figshare collection journal article supplement (https://gsapubs.figshare.com/articles/dataset/_/22090664)
Supplement: Supplementary file 1 [file 1]

## Sheet: 17alt08
Spot	g1-1	g1-2	g1-3	g1-4	g1-5	g1-6	g1-7	g1-8	g1-9	g1-10	g1-11	g1-12	g1-13	g1-14	g1-15	g1-16	g1-17	g1-18	g1-19	g1-20	g1-21	g1-22	g1-23	g1-24	g1-25	g1-26	g1-27	g1-28	g1-29	g1-30	g1-31	g1-32	g1-33	g1-34	g1-35	g1-36	g1-37	g1-38	g1-39	g1-40	g1-41	g1-42	g1-43	g1-44	g1-45	g1-46	g1-47	g1-49	g1-50
SiO2	37.34	37.36	37.38	37.84	37.38	37.37	37.52	37.39	37.39	37.39	37.27	37.41	37.52	37.21	37.25	37.33	37.39	37.44	37.27	37.29	37.25	37.25	37.22	37.34	37.26	37.21	37.45	37.18	37.29	37.49	37.48	37.36	37.19	37.07	37.28	37.21	37.3	36.66	37.51	37.01	37.13	36.95	36.88	36.93	37.11	37.22	37.12	37.56	37.48
TiO2	0.05	0.01	0.04	0.03	0.02	0.07	0.06	0.03	0.04	0.06	0.05	0.07	0.07	0.11	0.13	0.06	0.09	0.11	0.1	0.12	0.11	0.13	0.15	0.13	0.12	0.15	0.12	0.11	0.14	0.11	0.42	0.24	0.2	0.07	0.14	0.18	0.08	0.11	0.12	0.11	0.07	0.17	0.17	0.15	0.15	0.18	0.2	0.19	0.1
Al2O3	20.51	20.59	20.63	20.72	20.65	20.68	20.73	20.85	20.58	20.76	20.73	20.58	20.5	20.46	20.48	20.62	20.63	20.53	20.79	20.58	20.56	20.52	20.61	20.43	20.7	20.48	20.79	20.41	20.49	20.74	20.42	20.4	20.47	20.41	20.33	20.35	20.35	20.18	20.55	20.57	20.62	20.47	20.34	20.54	20.25	20.45	20.57	20.68	20.46
Cr2O3	0.01	0.03	0.03	0.03	0.04	0.06	0.02	0.05	0.03	0.02	0.03	0.07	0.04	0.03	0.05	0.04	0.05	0.02	0.03	0.03	0	0.03	0.07	0.04	0.05	0.04	0.05	0.04	0.04	0.04	0.06	0.04	0.06	0.07	0.06	0.09	0.06	0.1	0.18	0.02	0.12	0.07	0.04	0.05	0.07	0.06	0.07	0.1	0.07
FeO	29.35	28.3	28.58	29.09	28.95	28.75	28.54	28.19	27.91	28.48	27.9	28.06	28.5	28.16	28.13	28.54	28.03	28.05	27.91	28.23	27.98	28.31	27.74	27.7	27.36	27.04	27.46	27.56	27.42	27.34	27.05	27.62	27.02	26.54	27.27	27.34	26.69	27.27	27.32	26.42	27.57	27.19	26.4	26.98	26.43	27.25	27.27	27.85	27.01
MnO	3.98	3.41	3.56	3.6	3.53	3.9	4.01	4.15	4.03	3.98	4.05	4.54	4.48	4.76	4.85	4.87	4.8	5.17	5.34	5.53	5.4	5.37	5.39	5.37	5.6	5.51	5.49	5.9	5.82	5.89	5.82	5.83	5.8	6.44	6.52	6.4	6.3	6.2	6.42	6.56	6.5	6.46	6.18	6.73	6.4	6.17	5.82	5.44	5.78
MgO	3.31	4.09	4.04	3.89	4.07	3.83	3.78	3.74	3.64	3.68	3.66	3.68	3.59	3.53	3.6	3.48	3.48	3.29	3.41	3.37	3.35	3.36	3.34	3.33	3.19	3.31	3.2	3.29	3.21	3.24	3.13	3.15	3.15	3.06	3.09	3.13	3.14	3.06	3.1	3.03	3.09	3.18	3.04	3.09	3.12	3.31	3.38	3.36	3.31
CaO	4.54	4.82	4.83	4.71	4.95	5.03	4.95	4.99	5.04	4.95	5.11	4.97	4.98	5.03	4.99	5.09	5.04	5.09	5	4.92	5.15	5.06	4.88	5.21	4.96	4.93	4.77	4.86	5.1	4.64	5.09	5.13	4.92	4.96	4.83	4.92	4.85	4.77	4.43	4.69	4.45	4.76	4.76	4.81	5.49	5.04	4.98	4.94	5.07
Na2O	0	0	0	0.02	0	0.04	0.02	0.03	0.01	0.04	0.02	0	0.02	0	0.01	0.04	0	0.04	0.02	0.01	0.03	0.02	0	0.04	0.01	0.01	0	0.02	0.03	0.01	0.03	0.03	0	0.01	0	0.02	0.04	0.04	0.03	0.01	0.03	0.01	0.01	0.01	0.02	0.02	0.01	0.03	0.02
K2O	0.04	0.01	0.03	0	0.01	0	0.02	0.02	0	0	0	0	0	0	0.01	0	0	0	0	0	0.01	0.01	0.02	0.01	0	0	0.02	0.02	0	0	0	0	0	0	0	0	0	0	0.01	0.01	0	0	0.01	0	0	0	0	0	0.02
F
Cl
Totals	99.14	98.63	99.13	99.93	99.6	99.73	99.65	99.45	98.67	99.36	98.81	99.38	99.68	99.3	99.49	100.06	99.51	99.72	99.88	100.08	99.85	100.06	99.44	99.6	99.24	98.7	99.36	99.39	99.55	99.5	99.5	99.78	98.81	98.63	99.52	99.64	98.82	98.38	99.66	98.42	99.59	99.26	97.84	99.29	99.05	99.71	99.42	100.13	99.31
Oxygens	12	12	12	12	12	12	12	12	12	12	12	12	12	12	12	12	12	12	12	12	12	12	12	12	12	12	12	12	12	12	12	12	12	12	12	12	12	12	12	12	12	12	12	12	12	12	12	12	12
Si	3.011	3.009	3.001	3.014	2.992	2.99	3	2.995	3.014	2.999	3.002	3.002	3.006	2.996	2.994	2.988	3	3.003	2.985	2.987	2.989	2.986	2.994	3	2.999	3.008	3.007	2.997	2.999	3.008	3.009	3	3.007	3.006	3.004	2.996	3.017	2.991	3.012	3.005	2.992	2.986	3.011	2.984	3	2.991	2.987	2.999	3.014
Ti	0.003	0.001	0.003	0.002	0.001	0.004	0.004	0.002	0.002	0.004	0.003	0.004	0.004	0.007	0.008	0.003	0.006	0.007	0.006	0.007	0.007	0.008	0.009	0.008	0.007	0.009	0.007	0.007	0.009	0.007	0.025	0.014	0.012	0.004	0.008	0.011	0.005	0.007	0.007	0.007	0.004	0.011	0.01	0.009	0.009	0.011	0.012	0.011	0.006
Al	1.951	1.954	1.952	1.946	1.948	1.951	1.955	1.969	1.956	1.963	1.968	1.947	1.936	1.942	1.94	1.946	1.951	1.941	1.963	1.944	1.945	1.939	1.955	1.935	1.965	1.952	1.969	1.94	1.943	1.962	1.932	1.931	1.951	1.952	1.931	1.932	1.941	1.941	1.945	1.969	1.958	1.95	1.957	1.957	1.93	1.937	1.951	1.946	1.939
Cr	0.001	0.002	0.002	0.002	0.002	0.004	0.001	0.003	0.002	0.001	0.002	0.004	0.002	0.002	0.003	0.002	0.003	0.001	0.002	0.002	0	0.002	0.005	0.002	0.003	0.003	0.003	0.002	0.003	0.002	0.004	0.002	0.004	0.005	0.004	0.006	0.004	0.006	0.011	0.001	0.008	0.005	0.003	0.003	0.005	0.004	0.005	0.006	0.004
Fe3+
Fe2+	1.98	1.906	1.919	1.938	1.938	1.924	1.909	1.888	1.882	1.91	1.879	1.883	1.91	1.896	1.891	1.91	1.881	1.882	1.87	1.891	1.878	1.898	1.866	1.861	1.842	1.828	1.844	1.858	1.844	1.834	1.816	1.855	1.827	1.8	1.838	1.841	1.806	1.861	1.835	1.794	1.858	1.837	1.803	1.823	1.787	1.832	1.835	1.859	1.816
Mn	0.272	0.232	0.242	0.243	0.239	0.265	0.271	0.281	0.275	0.271	0.276	0.309	0.304	0.325	0.33	0.33	0.326	0.351	0.362	0.375	0.367	0.364	0.367	0.365	0.382	0.377	0.373	0.403	0.397	0.401	0.396	0.396	0.397	0.443	0.445	0.436	0.432	0.428	0.436	0.451	0.444	0.442	0.428	0.461	0.438	0.42	0.397	0.368	0.393
Mg	0.398	0.491	0.484	0.462	0.486	0.456	0.451	0.447	0.437	0.44	0.439	0.44	0.428	0.423	0.431	0.415	0.416	0.393	0.407	0.403	0.401	0.402	0.4	0.399	0.382	0.399	0.383	0.395	0.385	0.388	0.374	0.376	0.38	0.369	0.371	0.376	0.378	0.372	0.37	0.366	0.371	0.383	0.37	0.372	0.376	0.396	0.405	0.4	0.397
Ca	0.392	0.416	0.415	0.402	0.425	0.431	0.424	0.429	0.435	0.425	0.44	0.427	0.428	0.434	0.43	0.437	0.433	0.437	0.429	0.423	0.443	0.435	0.421	0.448	0.427	0.427	0.411	0.42	0.439	0.399	0.438	0.442	0.427	0.431	0.418	0.424	0.42	0.417	0.381	0.408	0.384	0.412	0.417	0.417	0.476	0.434	0.43	0.423	0.437
Na	0	0.001	0	0.004	0	0.005	0.004	0.004	0.002	0.007	0.002	0	0.003	0	0.002	0.005	0	0.005	0.002	0.002	0.004	0.004	0	0.007	0.002	0.002	0	0.003	0.005	0.001	0.004	0.004	0	0.001	0	0.004	0.007	0.006	0.005	0.001	0.005	0.001	0.002	0.001	0.003	0.004	0.002	0.004	0.003
K	0.004	0.002	0.003	0	0.001	0	0.002	0.002	0	0	0	0	0	0	0.001	0	0	0	0	0	0.001	0.001	0.002	0.001	0	0	0.002	0.002	0	0	0	0	0	0	0	0	0	0	0.001	0.001	0	0	0.001	0	0	0	0	0	0.002
Sum	8.012	8.013	8.021	8.012	8.032	8.031	8.021	8.02	8.006	8.019	8.012	8.018	8.022	8.025	8.028	8.037	8.017	8.021	8.027	8.034	8.035	8.038	8.019	8.026	8.01	8.006	8	8.028	8.022	8.003	7.999	8.021	8.004	8.012	8.02	8.026	8.009	8.031	8.005	8.004	8.024	8.027	8.001	8.027	8.024	8.029	8.024	8.016	8.011
alm	65.0888	62.5944	62.7124	63.6453	62.7591	62.5488	62.4877	62.0033	62.1327	62.7052	61.9314	61.5561	62.215	61.5984	61.3563	61.7723	61.551	61.443	60.9518	61.1578	60.7964	61.2456	61.1002	60.5597	60.7319	60.3101	61.2421	60.4031	60.1631	60.6883	60.0529	60.4431	60.2771	59.1522	59.8307	59.831	59.4862	60.4613	60.7214	59.4237	60.7785	59.7593	59.7416	59.3231	58.076	59.4419	59.8305	60.9508	59.6779
py	13.0835	16.1248	15.817	15.1724	15.7383	14.8244	14.7627	14.6798	14.4272	14.4452	14.4693	14.3838	13.9414	13.7427	13.9844	13.4217	13.6126	12.8306	13.266	13.0336	12.9815	12.9719	13.0976	12.9841	12.5948	13.164	12.72	12.8414	12.5612	12.8392	12.3677	12.2515	12.5371	12.1262	12.0768	12.2197	12.4506	12.0858	12.2435	12.1232	12.1361	12.4593	12.2598	12.1054	12.2197	12.8488	13.2051	13.1148	13.0463
grs	12.8863	13.6617	13.5621	13.202	13.763	14.0117	13.8789	14.0887	14.3612	13.9527	14.5023	13.9588	13.9414	14.1001	13.952	14.1332	14.1688	14.2671	13.9831	13.6805	14.3412	14.0368	13.7852	14.5786	14.0785	14.0878	13.65	13.6541	14.323	13.2032	14.4841	14.4021	14.0878	14.1637	13.6068	13.7797	13.834	13.5478	12.6075	13.5144	12.5613	13.4027	13.8171	13.5698	15.4696	14.0818	14.0202	13.8689	14.3608
spss	8.94149	7.61905	7.9085	7.9803	7.73964	8.61508	8.8707	9.22824	9.0789	8.89691	9.0969	10.1013	9.90228	10.5588	10.7073	10.6727	10.6675	11.4594	11.7992	12.1281	11.8809	11.7457	12.017	11.8776	12.5948	12.4381	12.3879	13.1014	12.9527	13.2694	13.0952	12.9032	13.098	14.558	14.4857	14.1696	14.2292	13.9051	14.4275	14.9387	14.524	14.3787	14.1816	15.0016	14.2346	13.6275	12.9442	12.0656	12.9149
ab
an
[truncated: 135 more columns]

## Sheet: 18alt43-1
Spot	g-1	g-2	g-3	g-4	g-5	g-6	g-7	g-8	g-9	g-10	g-11	g-12	g-13	g-14	g-15	g-16	g-17	g-18	g-19	g-20	g-21	g-22	g-23	g-24	g-25	g-26	g-27	g-28	g-29	g-30	g-31	g-32	g-33	g-34	g-35	g-36	g-37	g-38	g-39	g-40	g-41	g-42	g-43	g-44	g-45	g-46	g-47	g-48	g-49
SiO2	37.23	37.55	37.84	37.65	37.55	37.57	37.84	37.68	37.53	37.81	37.79	37.57	37.68	37.52	37.42	37.42	37.82	37.68	37.9	37.8	37.73	37.54	37.65	37.85	37.87	37.97	37.73	37.94	38.13	37.83	37.94	37.93	37.98	38.1	37.88	37.64	37.87	37.85	37.91	37.72	38.07	37.95	37.64	37.85	38.06	37.74	37.88	37.78	37.73
TiO2	0	0	0	0.01	0.01	0.05	0.01	0.05	0.01	0.05	0.01	0.03	0	0.07	0.01	0.04	0.07	0.02	0.04	0	0.04	0.01	0.01	0.03	0	0.06	0.04	0.02	0.01	0.07	0	0.04	0	0.01	0.04	0.05	0.03	0.01	0	0	0.01	0.01	0.01	0.05	0	0	0	0	0.03
Al2O3	21.01	20.98	21.25	21.15	21.1	21.16	21.06	20.97	21.21	21.2	20.99	21.09	20.97	20.91	20.9	20.81	21.06	21.16	21.09	20.97	20.96	21.13	21.03	21.25	21.45	21.27	21.2	21.27	21.26	21.25	21.19	21.14	21.19	21.2	21.1	21.01	21.15	21.37	21.28	21.44	20.97	21.28	20.97	21.33	21.12	21.23	20.96	21.04	21.25
Cr2O3	0.02	0	0	0	0.01	0	0	0.01	0.01	0	0.01	0	0	0	0	0.03	0	0.02	0	0	0.01	0	0	0	0	0	0.01	0	0.01	0	0.01	0	0.01	0	0	0	0.01	0	0	0.01	0	0.01	0	0	0	0	0	0	0
FeO	33.33	32.37	32.79	32.2	31.75	31.98	32.11	31.81	31.63	31.66	31.83	30.98	31.78	31.18	31.45	31.15	30.91	30.55	31.43	30.58	30.91	30.68	30.94	30.74	30.63	31.14	30.66	30.69	30.79	30.08	31.05	31.02	31.42	31.05	31.71	31.74	31.38	31.74	31.68	31.75	31.61	32.47	33.26	32.05	32.08	32.38	33.6	33.4	33.42
MnO	1.13	1.1	1.07	1.03	1.03	0.98	1.03	0.83	0.86	0.96	0.88	0.95	1.01	0.89	0.87	0.88	0.84	0.88	0.93	0.93	0.81	0.85	0.87	0.76	0.72	0.72	0.9	0.73	0.76	0.83	0.84	0.83	0.81	0.89	0.82	0.81	0.83	0.94	0.88	0.96	0.88	1.05	1.19	0.99	0.89	0.93	1.08	1.03	1.02
MgO	3.52	3.88	4.06	4.28	4.19	4.33	4.54	4.52	4.44	4.53	4.67	4.62	4.67	4.63	4.67	4.67	4.7	4.65	4.62	4.77	4.84	4.96	4.94	5.03	5	5.08	5.07	5.09	5.01	4.98	5.03	5.07	5.15	4.95	5.03	4.91	4.81	4.75	4.75	4.76	4.65	4.56	3.47	4.53	4.29	4.23	4.04	3.97	3.83
CaO	3.1	3.26	3.35	3.35	3.36	3.5	3.44	3.43	3.56	3.58	3.56	3.45	3.62	3.69	3.64	3.71	3.66	3.82	3.7	3.77	3.59	3.47	3.44	3.38	3.42	3.54	3.49	3.54	3.47	3.39	3.51	3.43	3.41	3.5	3.36	3.43	3.39	3.42	3.43	3.42	3.39	3.42	3.4	3.57	3.55	2.95	3.14	3.23	3.02
Na2O	0	0	0	0	0	0.01	0	0.01	0	0	0	0	0.03	0	0.02	0	0.01	0.01	0	0.03	0.01	0	0.01	0.02	0	0.02	0	0.01	0	0	0.07	0	0	0	0	0	0	0.01	0.01	0	0.01	0	0.03	0	0.02	0	0	0.01	0
K2O	0.01	0	0	0	0.01	0	0	0.02	0.02	0	0.01	0	0	0	0.01	0.02	0	0	0	0	0	0	0	0	0.01	0	0	0	0.01	0	0	0	0	0	0	0	0.01	0	0	0	0.01	0.02	0	0	0	0	0	0.01	0
F
Cl
Totals	99.35	99.14	100.37	99.68	99.02	99.59	100.05	99.33	99.27	99.8	99.73	98.69	99.76	98.91	98.99	98.74	99.08	98.79	99.71	98.86	98.9	98.63	98.88	99.06	99.12	99.8	99.1	99.29	99.46	98.43	99.64	99.47	99.96	99.7	99.94	99.59	99.49	100.08	99.94	100.06	99.6	100.76	99.98	100.36	100.01	99.46	100.71	100.46	100.31
Oxygens	12	12	12	12	12	12	12	12	12	12	12	12	12	12	12	12	12	12	12	12	12	12	12	12	12	12	12	12	12	12	12	12	12	12	12	12	12	12	12	12	12	12	12	12	12	12	12	12	12
Si	2.998	3.014	3.003	3.002	3.01	2.997	3.005	3.009	2.998	3.003	3.006	3.01	2.999	3.005	2.999	3.004	3.015	3.011	3.01	3.02	3.015	3.004	3.008	3.012	3.009	3.004	3.004	3.011	3.021	3.021	3.008	3.011	3.004	3.017	3.002	2.997	3.01	2.996	3.004	2.988	3.026	2.995	3.01	2.994	3.019	3.012	3.006	3.003	3.001
Ti	0	0	0	0.001	0	0.003	0.001	0.003	0	0.003	0	0.002	0	0.004	0.001	0.003	0.004	0.001	0.002	0	0.002	0.001	0.001	0.002	0	0.004	0.002	0.001	0.001	0.005	0	0.002	0	0	0.003	0.003	0.002	0	0	0	0	0.001	0	0.003	0	0	0	0	0.002
Al	1.994	1.986	1.988	1.988	1.994	1.99	1.971	1.974	1.997	1.986	1.969	1.992	1.968	1.975	1.974	1.969	1.98	1.994	1.975	1.974	1.974	1.994	1.981	1.993	2.009	1.984	1.99	1.99	1.985	2	1.98	1.978	1.976	1.979	1.971	1.972	1.982	1.994	1.988	2.002	1.964	1.979	1.977	1.989	1.975	1.997	1.961	1.972	1.993
Cr	0.001	0	0	0	0.001	0	0	0.001	0.001	0	0.001	0	0	0	0	0.002	0	0.001	0	0	0	0	0	0	0	0	0	0	0.001	0	0.001	0	0	0	0	0	0.001	0	0	0.001	0	0.001	0	0	0	0	0	0	0
Fe3+
Fe2+	2.244	2.173	2.176	2.147	2.128	2.134	2.132	2.124	2.113	2.103	2.117	2.076	2.116	2.089	2.108	2.091	2.061	2.042	2.088	2.043	2.065	2.054	2.068	2.046	2.035	2.06	2.041	2.037	2.04	2.009	2.059	2.059	2.078	2.056	2.101	2.113	2.086	2.101	2.099	2.103	2.101	2.143	2.225	2.12	2.128	2.161	2.23	2.22	2.224
Mn	0.077	0.075	0.072	0.07	0.07	0.066	0.07	0.056	0.058	0.064	0.059	0.065	0.068	0.061	0.059	0.06	0.057	0.059	0.062	0.063	0.055	0.057	0.059	0.051	0.049	0.048	0.061	0.049	0.051	0.056	0.056	0.056	0.054	0.06	0.055	0.055	0.056	0.063	0.059	0.064	0.06	0.071	0.081	0.066	0.06	0.063	0.072	0.07	0.069
Mg	0.422	0.465	0.48	0.508	0.501	0.515	0.537	0.538	0.529	0.537	0.553	0.551	0.554	0.553	0.558	0.559	0.558	0.553	0.547	0.568	0.576	0.591	0.589	0.596	0.592	0.598	0.601	0.602	0.591	0.592	0.594	0.6	0.607	0.584	0.594	0.582	0.57	0.56	0.56	0.562	0.551	0.536	0.414	0.534	0.507	0.503	0.478	0.47	0.454
Ca	0.268	0.28	0.285	0.286	0.288	0.299	0.293	0.293	0.304	0.305	0.303	0.296	0.309	0.317	0.313	0.319	0.313	0.327	0.315	0.322	0.307	0.297	0.294	0.288	0.291	0.3	0.298	0.301	0.295	0.29	0.298	0.292	0.289	0.297	0.285	0.292	0.289	0.29	0.291	0.29	0.288	0.289	0.291	0.302	0.302	0.252	0.267	0.275	0.258
Na	0	0	0.001	0	0	0.002	0	0.001	0	0	0	0	0.005	0	0.003	0	0.002	0.002	0	0.004	0.001	0	0.001	0.003	0	0.003	0	0.002	0	0	0.011	0	0	0	0	0	0	0.001	0.002	0	0.002	0	0.004	0	0.003	0	0	0.002	0
K	0.001	0	0	0	0.001	0	0	0.002	0.002	0	0.001	0	0	0	0.001	0.002	0	0	0	0	0	0	0	0	0.001	0	0	0	0.001	0	0	0	0	0	0	0	0.002	0	0	0	0.001	0.002	0	0	0	0	0	0.001	0
Sum	8.005	7.993	8.004	8.003	7.993	8.006	8.009	8.002	8.003	8.001	8.009	7.992	8.019	8.003	8.015	8.009	7.991	7.991	8	7.995	7.996	7.998	8.001	7.991	7.987	8.002	7.998	7.994	7.986	7.974	8.007	7.998	8.008	7.993	8.01	8.014	7.997	8.007	8.003	8.011	7.993	8.015	8.003	8.009	7.995	7.989	8.014	8.012	8.001
alm	74.5267	72.6027	72.2204	71.3052	71.242	70.8029	70.3166	70.5413	70.3395	69.8903	69.8219	69.4779	69.4454	69.1722	69.3878	69.0327	68.9528	68.5005	69.3227	68.1909	68.7646	68.4895	68.7043	68.6347	68.5878	68.5296	68.0107	68.1499	68.5254	68.171	68.4736	68.4736	68.6262	68.6019	69.2257	69.4609	69.5102	69.708	69.7574	69.6588	70.0333	70.5166	73.8957	70.1522	71.0043	72.5411	73.1867	73.1466	74.01
py	14.0153	15.5363	15.931	16.8715	16.7727	17.0869	17.7111	17.8678	17.6099	17.8465	18.2388	18.4404	18.1818	18.3113	18.3673	18.4549	18.6685	18.5508	18.1607	18.9586	19.1808	19.7066	19.5681	19.9933	19.9528	19.8935	20.0267	20.1405	19.8522	20.0882	19.7539	19.9534	20.0462	19.4862	19.5717	19.1321	18.9937	18.58	18.6108	18.6154	18.3667	17.6374	13.7496	17.6704	16.9169	16.8849	15.6876	15.486	15.1082
grs	8.9007	9.35516	9.45901	9.49851	9.64178	9.92037	9.66359	9.73099	10.1198	10.1363	9.9934	9.90629	10.1411	10.4967	10.3028	10.5315	10.4717	10.9695	10.4582	10.7477	10.2231	9.9033	9.76744	9.66119	9.80789	9.98004	9.93002	10.0703	9.9093	9.84052	9.91021	9.71068	9.54425	9.90991	9.39044	9.59895	9.63012	9.62177	9.67099	9.60583	9.6	9.50971	9.66456	9.99338	10.0767	8.45921	8.76272	9.06096	8.58569
spss	2.55729	2.50585	2.38964	2.32481	2.34349	2.18978	2.30871	1.85985	1.93076	2.12695	1.94591	2.17537	2.2317	2.01987	1.94207	1.98085	1.90699	1.9792	2.05843	2.1028	1.8315	1.90063	1.96013	1.71084	1.6515	1.59681	2.03266	1.63934	1.71313	1.90024	1.86232	1.86232	1.78336	2.002	1.81219	1.80802	1.86604	2.09025	1.96078	2.11991	2	2.33629	2.69014	2.18398	2.002	2.1148	2.36298	2.30643	2.29617
ab
an
e: enclave
[truncated: 41 more columns]

## Sheet: 18alt43-2
Spot	g-1	g-2	g-3	g-4	g-5	g-6	g-7	g-8	g-9	g-12	g-13	g-14	g-15	g-16	g-17	g-18	g-19	g-20	g-21	g-22	g-23	g-24	g-25	g-26	g-27	g-28	g-29	g-30	g-31	g-32	g-33	g-34	g-35	g-36	g-37	g-38	g-39	g-40	g-41	g-42	g-43	g-44	g-45	g-46	g-47	g-48	g-49	g-55	g-56
SiO2	37.73	37.78	37.83	38.22	37.91	37.77	37.94	37.93	37.83	37.88	37.99	37.9	37.81	37.83	38.09	37.85	37.82	38.1	38.12	37.77	38.2	37.97	38.18	38.13	37.98	38.01	37.92	37.9	38.06	38.06	38.05	37.71	37.99	37.89	38.02	37.82	37.94	37.83	37.98	37.91	37.61	37.7	37.73	37.74	37.52	37.68	37.78	37.81	37.74
TiO2	0	0	0.04	0	0.03	0.03	0	0.01	0	0	0.01	0	0	0.01	0.01	0.01	0	0.05	0.02	0.02	0.01	0.08	0.03	0.01	0.02	0.04	0.02	0.08	0.01	0	0.08	0.07	0.06	0.01	0.01	0	0	0	0.01	0	0.04	0.05	0.04	0.04	0.03	0	0.03	0.01	0.05
Al2O3	21.08	21.1	21.08	21.32	21.14	21.2	20.95	21.18	21.28	21.23	21.16	21.11	21.29	21.31	21.35	21.12	21.31	21.31	20.95	21.13	21.16	21.16	21.39	21.2	21.39	21.23	21.26	21.23	21.22	21.26	21.27	21.44	21.27	21.18	21.28	21.07	21.17	21.24	21.31	20.98	21.25	21.05	20.81	21.09	21.15	21	21.12	21.14	21.37
Cr2O3	0	0	0	0.01	0	0.01	0	0	0	0	0	0.01	0.02	0	0	0	0.04	0.02	0	0	0.01	0.01	0.01	0	0	0	0	0	0.01	0.01	0	0	0	0.02	0	0	0.01	0.01	0.02	0.01	0	0.01	0	0.02	0	0.01	0	0.01	0.02
FeO	33.59	32.57	32.14	32.44	32.09	32.54	33.12	32.48	32.34	32.51	32.67	31.54	32.96	32.67	32.25	32.06	30.8	31.39	31.74	31.94	31.91	32.34	31.95	32	32.46	31.34	32.13	32.39	31.68	32.35	32.66	31.9	31.76	31.96	31.58	32.26	31.91	31.95	31.9	31.61	31.88	31.91	31.39	31.75	32.12	31.7	31.84	31.83	32.49
MnO	1.51	1.23	1.21	1.16	1.14	1.2	1.2	1.07	1.05	1.13	1.07	1.04	1.04	1.01	1.03	1.06	0.98	0.98	1.07	1.05	0.99	0.92	1.01	0.92	1.07	1.11	0.95	0.98	0.99	0.85	0.96	1.01	1.01	0.98	0.99	0.99	1.05	1.12	1.1	1.09	1.1	1.16	1.14	1.15	1.2	1.08	1.34	1.24	1.14
MgO	3.24	3.9	4.14	4.49	4.49	4.49	4.61	4.58	4.45	4.51	4.69	4.85	4.81	4.89	4.89	4.81	4.88	4.8	4.78	4.83	4.93	5.07	4.96	4.93	4.87	4.91	4.84	4.91	4.9	4.95	4.84	4.79	4.82	4.71	4.68	4.75	4.72	4.61	4.63	4.47	4.55	4.48	4.51	4.5	4.49	4.43	4.38	4.28	4.27
CaO	3.28	3.28	3.2	2.84	2.86	2.82	2.89	2.94	2.98	2.95	2.98	2.94	2.95	3.04	2.89	3.16	3.14	3.13	3.21	3.25	3.27	3.25	3.04	3.02	3.06	3.06	3.15	3.06	2.87	3.02	3.19	3.26	3.1	3.24	3.45	3.23	3.47	3.45	3.42	3.5	3.46	3.53	3.54	3.53	3.53	3.54	3.51	3.53	3.49
Na2O	0.02	0	0.01	0.01	0	0.01	0.03	0	0	0	0	0	0.01	0.02	0	0	0.01	0.01	0.02	0.01	0.03	0	0	0.02	0	0.01	0	0	0.01	0.02	0	0	0.04	0.01	0.01	0.02	0.02	0	0	0.01	0.01	0	0	0	0	0	0	0	0
K2O	0	0	0.01	0	0	0	0	0.01	0.01	0	0	0	0.01	0.01	0	0	0	0.01	0	0	0.02	0	0.02	0	0	0	0	0	0.01	0.01	0	0	0	0.01	0.01	0	0	0	0	0.01	0	0	0.01	0	0	0	0	0	0
F
Cl
Totals	100.46	99.85	99.67	100.49	99.67	100.08	100.75	100.19	99.95	100.22	100.57	99.39	100.9	100.78	100.51	100.09	98.98	99.79	99.91	99.99	100.53	100.8	100.58	100.24	100.84	99.72	100.27	100.55	99.76	100.53	101.06	100.18	100.05	100.01	100.04	100.14	100.28	100.21	100.36	99.59	99.89	99.9	99.18	99.83	100.03	99.44	100	99.86	100.57
Oxygens	12	12	12	12	12	12	12	12	12	12	12	12	12	12	12	12	12	12	12	12	12	12	12	12	12	12	12	12	12	12	12	12	12	12	12	12	12	12	12	12	12	12	12	12	12	12	12	12	12
Si	3.009	3.013	3.016	3.017	3.016	3.001	3.002	3.007	3.005	3.003	3.003	3.016	2.983	2.985	3.003	3.001	3.013	3.016	3.023	2.997	3.011	2.991	3.005	3.012	2.99	3.013	2.999	2.992	3.017	3.002	2.992	2.985	3.006	3.004	3.009	3	3.002	2.997	3.001	3.018	2.99	2.999	3.017	3.002	2.985	3.008	3.003	3.007	2.987
Ti	0	0	0.002	0	0.002	0.002	0	0	0	0	0.001	0	0	0.001	0.001	0.001	0	0.003	0.001	0.001	0.001	0.005	0.002	0.001	0.001	0.002	0.001	0.005	0	0	0.005	0.004	0.004	0	0.001	0	0	0	0.001	0	0.002	0.003	0.002	0.003	0.002	0	0.002	0.001	0.003
Al	1.982	1.984	1.981	1.984	1.983	1.986	1.955	1.979	1.993	1.985	1.971	1.981	1.981	1.982	1.985	1.974	2.002	1.989	1.959	1.977	1.966	1.965	1.984	1.974	1.986	1.984	1.982	1.976	1.983	1.977	1.972	2.001	1.984	1.98	1.985	1.971	1.975	1.984	1.985	1.969	1.992	1.974	1.962	1.977	1.984	1.976	1.978	1.983	1.994
Cr	0	0	0	0	0	0.001	0	0	0	0	0	0	0.001	0	0	0	0.002	0.001	0	0	0	0.001	0	0	0	0	0	0	0.001	0	0	0	0	0.001	0	0	0	0.001	0.001	0.001	0	0.001	0	0.001	0	0.001	0	0.001	0.001
Fe3+
Fe2+	2.24	2.172	2.143	2.142	2.136	2.162	2.191	2.153	2.149	2.156	2.159	2.099	2.175	2.156	2.127	2.126	2.052	2.078	2.104	2.12	2.103	2.13	2.103	2.114	2.138	2.078	2.125	2.139	2.1	2.134	2.148	2.111	2.102	2.119	2.09	2.14	2.111	2.117	2.108	2.105	2.12	2.123	2.1	2.112	2.137	2.116	2.116	2.118	2.151
Mn	0.102	0.083	0.082	0.078	0.077	0.081	0.08	0.072	0.071	0.076	0.072	0.07	0.069	0.068	0.069	0.071	0.066	0.065	0.072	0.071	0.066	0.061	0.067	0.062	0.071	0.074	0.064	0.066	0.067	0.057	0.064	0.068	0.068	0.066	0.067	0.067	0.07	0.075	0.073	0.073	0.074	0.078	0.077	0.078	0.081	0.073	0.09	0.083	0.076
Mg	0.385	0.464	0.492	0.528	0.533	0.531	0.544	0.541	0.527	0.533	0.553	0.575	0.565	0.575	0.575	0.569	0.58	0.566	0.564	0.571	0.579	0.595	0.582	0.58	0.571	0.58	0.571	0.578	0.579	0.581	0.568	0.565	0.569	0.557	0.552	0.561	0.556	0.544	0.545	0.531	0.539	0.531	0.538	0.533	0.532	0.527	0.518	0.508	0.504
Ca	0.28	0.28	0.274	0.241	0.244	0.24	0.245	0.249	0.253	0.251	0.253	0.25	0.25	0.257	0.244	0.269	0.268	0.265	0.273	0.277	0.276	0.274	0.257	0.256	0.258	0.26	0.267	0.259	0.244	0.255	0.269	0.277	0.263	0.275	0.293	0.274	0.294	0.293	0.289	0.298	0.294	0.301	0.304	0.301	0.301	0.303	0.299	0.301	0.296
Na	0.003	0	0.002	0.001	0	0.002	0.005	0	0	0	0	0	0.001	0.003	0	0	0.001	0.002	0.003	0.001	0.005	0.001	0	0.003	0	0.002	0	0	0.001	0.003	0	0	0.006	0.001	0.002	0.002	0.003	0	0	0.001	0.002	0	0	0	0	0	0	0	0
K	0	0	0.001	0	0	0	0	0.001	0.001	0	0	0	0.001	0.001	0	0	0	0.001	0	0	0.002	0	0.002	0	0	0	0	0	0.001	0.001	0	0	0	0.001	0.002	0	0	0	0	0.001	0	0	0.001	0	0	0	0	0	0
Sum	8.002	7.995	7.992	7.991	7.99	8.005	8.022	8.004	7.999	8.004	8.011	7.993	8.026	8.026	8.004	8.011	7.985	7.987	7.999	8.014	8.009	8.022	8.002	8.001	8.016	7.994	8.009	8.015	7.992	8.011	8.017	8.011	8.001	8.006	8	8.016	8.012	8.011	8.005	7.998	8.013	8.011	8	8.007	8.022	8.004	8.007	8.001	8.012
alm	74.4929	72.4241	71.6483	71.6628	71.4381	71.7319	71.6013	71.4096	71.6333	71.4854	71.0899	70.1069	71.1017	70.5497	70.5473	70.0494	69.1841	69.8722	69.8307	69.7598	69.5437	69.6078	69.8903	70.1859	70.3752	69.4519	70.2015	70.3156	70.2341	70.4988	70.4493	69.8775	70.02	70.2353	69.6203	70.3485	69.647	69.8911	69.9171	70.0033	70.0363	69.9967	69.5595	69.8413	70.0426	70.0894	69.9967	70.3654	71.0605
py	12.8035	15.4718	16.4493	17.6648	17.8261	17.6178	17.7778	17.9436	17.5667	17.6724	18.2088	19.2051	18.4701	18.8154	19.0713	18.7479	19.555	19.0316	18.7189	18.7891	19.1468	19.4444	19.342	19.2563	18.7953	19.385	18.8636	19.0007	19.3645	19.1939	18.6291	18.7024	18.954	18.462	18.3877	18.4418	18.3438	17.9597	18.0763	17.6588	17.8064	17.5074	17.8205	17.6257	17.4369	17.4561	17.1353	16.8771	16.6501
grs	9.31161	9.33645	9.16082	8.0629	8.16054	7.96284	8.00654	8.25871	8.43333	8.32228	8.33059	8.35003	8.17261	8.40969	8.09287	8.86326	9.03574	8.91056	9.06074	9.11484	9.12698	8.95425	8.54104	8.49934	8.49243	8.68984	8.82061	8.51414	8.16054	8.42418	8.82256	9.16915	8.76083	9.11501	9.76016	9.00723	9.69977	9.67316	9.58541	9.91021	9.71259	9.92417	10.0696	9.9537	9.86562	10.0364	9.89084	10	9.77866
spss	3.39209	2.76759	2.74156	2.60957	2.57525	2.68746	2.61438	2.38806	2.36667	2.51989	2.37076	2.33801	2.25564	2.22513	2.28856	2.33937	2.22522	2.18561	2.38964	2.33629	2.18254	1.99346	2.22665	2.05843	2.33706	2.47326	2.1143	2.16963	2.2408	1.88305	2.09905	2.25091	2.26516	2.1876	2.23185	2.2025	2.30947	2.47606	2.42123	2.42767	2.44466	2.57171	2.55051	2.57937	2.65487	2.41802	2.97717	2.75748	2.51074
ab
an
e: enclave
[truncated: 56 more columns]

## Sheet: 18alt45
Spot	g-1	g-2	g-3	g-4	g-5	g-6	g-7	g-8	g-9	g-10	g-11	g-12	g-13	g-14	g-15	g-16	g-17	g-18	g-19	g-20	g-21	g-22	g-23	g-24	g-25	g-26	g-27	g-28	g-29	g-30	g-31	g-32	g-33	g-34	g-35	g-36	g-37	g-38	g-39	g-40	g-41	g-42	g-43	g-44	g-45	g-46	g-47	g-48	g-49
SiO2	38.24	37.62	37.94	37.84	37.76	37.92	37.99	38.05	37.98	37.9	38.07	37.96	37.8	38.05	37.93	37.92	37.84	37.63	38	37.65	38.01	37.9	38.03	38.06	38.01	38.16	38.26	38.41	38.37	38.21	38.19	38	38.15	38.29	38.23	38.41	38.11	38.3	38.08	38.28	38.22	38.2	38.35	38.66	38.26	38.23	38.31	38.36	38.3
TiO2	0.03	0.01	0.02	0	0.03	0.06	0	0.06	0.01	0	0.01	0.04	0.03	0	0.02	0	0	0	0.01	0	0.01	0	0	0.01	0.06	0.02	0.01	0.05	0	0	0	0.06	0	0.02	0.01	0	0.02	0.01	0	0	0	0	0	0	0.05	0	0.01	0	0.04
Al2O3	21.42	21.02	20.86	21.21	21.24	21.23	21.33	21.27	21.2	21.12	21.41	21.29	21.28	21.37	21.22	21.31	21.3	21.24	21.41	21.46	21.22	21.3	21.35	21.37	21.36	21.4	21.22	21.34	21.47	21.43	21.37	21.32	21.2	21.55	21.57	21.57	21.5	21.49	21.57	21.51	21.44	21.53	21.67	21.56	21.65	21.47	21.43	21.57	21.56
Cr2O3	0.02	0.01	0.06	0.02	0	0.03	0.01	0.03	0.04	0.02	0.02	0.03	0.01	0.01	0.02	0.03	0.02	0.03	0.03	0.02	0.02	0	0.02	0.03	0.01	0.03	0	0.03	0.04	0.01	0.01	0	0.01	0.04	0.04	0.01	0.02	0	0	0.01	0.04	0.01	0.01	0.03	0.01	0.02	0.01	0.01	0.02
FeO	32.02	31.43	31.63	31.39	31.35	31	30.6	30.26	30.27	30.46	30.4	30.34	30.66	30.74	30.58	30.47	30.2	31.08	29.59	30.97	30.41	30.65	30.15	31.08	30.23	30.94	31.3	30.57	30.46	31.22	30.59	30.75	30.77	30.63	30.93	30.32	31.06	30.37	30.58	31.29	30.72	30.34	31.21	30.62	30.97	30.75	31.13	30.71	31.08
MnO	1.28	1.15	1.14	1.12	1.04	1.11	1.13	0.97	1.13	1.09	0.99	1.01	1.12	1	1.01	1.07	1.18	1.08	0.94	1.09	1.01	0.99	1.1	1.1	0.96	1.09	1.02	0.96	1	1	0.89	1.13	1	1.01	1.06	0.98	1.18	0.99	1.05	1.07	1.08	0.96	1.02	1.08	1.15	0.92	1.02	1.08	1.01
MgO	4.77	5.06	5.1	5.28	5.43	5.67	5.73	5.71	5.98	6	5.99	6.07	6.16	6.17	6.22	6.3	6.34	6.39	6.25	6.37	6.42	6.5	6.44	6.45	6.41	6.41	6.59	6.5	6.41	6.41	6.47	6.48	6.54	6.44	6.47	6.43	6.48	6.34	6.43	6.42	6.48	6.46	6.4	6.38	6.5	6.49	6.54	6.55	6.48
CaO	2.38	2.64	2.79	2.96	3.1	3.06	2.98	2.88	2.67	2.5	2.47	2.44	2.34	2.37	2.3	2.25	2.12	2.1	1.95	1.95	1.96	1.94	1.82	1.92	1.85	1.75	1.9	1.92	1.93	1.89	1.9	2	1.91	1.9	1.96	1.99	2	1.9	1.94	1.92	1.94	1.99	1.87	1.94	1.74	1.83	1.9	1.91	1.78
Na2O	0	0.01	0.01	0.01	0	0	0	0	0.01	0	0	0	0.03	0.03	0.02	0.01	0.01	0	0.01	0.03	0.01	0.01	0	0	0.02	0.03	0.01	0.03	0.03	0.01	0.01	0.01	0	0.03	0.01	0	0.02	0	0.01	0.03	0	0	0.03	0	0.01	0.01	0.01	0	0.01
K2O	0	0	0.01	0	0.02	0	0.01	0	0	0	0	0.02	0.01	0	0	0	0	0	0	0.01	0	0.01	0.01	0	0.02	0.01	0	0	0	0	0	0	0.01	0.01	0	0	0	0	0.01	0	0	0	0	0	0	0.02	0.01	0	0.01
F
Cl
Totals	100.17	98.97	99.55	99.83	99.97	100.08	99.77	99.21	99.28	99.08	99.36	99.2	99.45	99.73	99.32	99.37	99	99.55	98.19	99.55	99.06	99.29	98.93	100.02	98.93	99.84	100.31	99.81	99.72	100.18	99.44	99.74	99.59	99.91	100.27	99.72	100.41	99.41	99.66	100.52	99.92	99.49	100.57	100.26	100.34	99.74	100.38	100.2	100.29
Oxygens	12	12	12	12	12	12	12	12	12	12	12	12	12	12	12	12	12	12	12	12	12	12	12	12	12	12	12	12	12	12	12	12	12	12	12	12	12	12	12	12	12	12	12	12	12	12	12	12	12
Si	3.02	3.008	3.017	2.998	2.988	2.992	3	3.013	3.007	3.008	3.008	3.005	2.992	3	3.002	2.999	3	2.98	3.022	2.978	3.01	2.998	3.011	2.994	3.009	3.003	3.001	3.016	3.015	2.999	3.011	2.995	3.008	3.005	2.995	3.015	2.987	3.017	2.998	2.996	3.003	3.007	2.997	3.021	2.995	3.006	3	3.003	2.999
Ti	0.002	0.001	0.001	0	0.001	0.004	0	0.003	0	0	0.001	0.003	0.002	0	0.001	0	0	0	0.001	0	0.001	0	0	0.001	0.004	0.001	0	0.003	0	0	0	0.003	0	0.001	0.001	0	0.001	0.001	0	0	0	0	0	0	0.003	0	0.001	0	0.002
Al	1.994	1.981	1.956	1.981	1.981	1.975	1.985	1.986	1.979	1.977	1.994	1.987	1.986	1.986	1.98	1.986	1.991	1.983	2.007	2.001	1.981	1.986	1.993	1.982	1.994	1.986	1.963	1.976	1.989	1.983	1.986	1.981	1.971	1.994	1.992	1.996	1.987	1.996	2.002	1.985	1.986	1.998	1.996	1.986	1.997	1.99	1.978	1.991	1.991
Cr	0.001	0.001	0.003	0.001	0	0.002	0.001	0.002	0.003	0.001	0.001	0.002	0.001	0.001	0.001	0.002	0.001	0.002	0.002	0.001	0.001	0	0.001	0.002	0.001	0.002	0	0.002	0.003	0	0.001	0	0	0.002	0.002	0.001	0.001	0	0	0	0.003	0	0.001	0.002	0.001	0.001	0.001	0	0.001
Fe3+
Fe2+	2.115	2.102	2.104	2.08	2.075	2.045	2.021	2.004	2.004	2.022	2.009	2.009	2.03	2.027	2.024	2.015	2.003	2.058	1.969	2.049	2.014	2.028	1.997	2.045	2.001	2.036	2.053	2.007	2.001	2.049	2.017	2.027	2.029	2.01	2.026	1.991	2.036	2.001	2.013	2.048	2.018	1.997	2.039	2.001	2.027	2.022	2.039	2.01	2.035
Mn	0.086	0.078	0.077	0.075	0.07	0.074	0.075	0.065	0.076	0.073	0.066	0.068	0.075	0.067	0.067	0.072	0.079	0.073	0.063	0.073	0.068	0.067	0.074	0.074	0.064	0.073	0.068	0.064	0.066	0.067	0.06	0.075	0.067	0.067	0.071	0.065	0.078	0.066	0.07	0.071	0.072	0.064	0.068	0.071	0.077	0.061	0.068	0.072	0.067
Mg	0.561	0.603	0.604	0.623	0.64	0.666	0.674	0.674	0.706	0.709	0.705	0.716	0.726	0.725	0.734	0.743	0.749	0.754	0.741	0.751	0.758	0.766	0.76	0.756	0.757	0.751	0.77	0.761	0.751	0.75	0.761	0.761	0.768	0.753	0.756	0.752	0.757	0.745	0.755	0.749	0.758	0.758	0.746	0.743	0.758	0.76	0.763	0.764	0.756
Ca	0.201	0.227	0.238	0.251	0.263	0.259	0.252	0.245	0.227	0.212	0.209	0.207	0.198	0.2	0.195	0.191	0.18	0.178	0.166	0.165	0.166	0.164	0.155	0.161	0.157	0.148	0.16	0.162	0.163	0.159	0.161	0.169	0.161	0.16	0.164	0.167	0.168	0.161	0.164	0.161	0.163	0.167	0.156	0.163	0.146	0.154	0.159	0.16	0.149
Na	0	0.002	0.001	0.001	0	0	0	0	0.001	0	0	0.001	0.004	0.004	0.004	0.002	0.002	0	0.002	0.004	0.002	0.001	0	0	0.003	0.004	0.002	0.004	0.004	0.002	0.001	0.002	0	0.004	0.001	0	0.002	0	0.001	0.004	0	0	0.005	0	0.001	0.001	0.001	0	0.001
K	0	0	0.001	0	0.002	0	0.001	0	0	0	0	0.002	0.001	0	0	0	0	0	0	0.001	0	0.001	0.001	0	0.002	0.001	0	0	0	0	0	0	0.001	0.001	0	0	0	0	0.001	0	0	0	0	0	0	0.002	0.001	0	0.001
Sum	7.981	8.001	8.003	8.011	8.021	8.016	8.008	7.991	8.002	8.003	7.994	7.999	8.015	8.009	8.008	8.009	8.005	8.028	7.973	8.023	8	8.01	7.992	8.014	7.992	8.005	8.018	7.995	7.992	8.01	7.997	8.012	8.007	7.998	8.008	7.987	8.019	7.985	8.003	8.014	8.003	7.993	8.008	7.986	8.004	7.999	8.011	8.002	8.004
alm	71.3804	69.8339	69.5997	68.6695	68.0774	67.1813	66.8762	67.0683	66.5118	67.0424	67.2131	66.9667	67.0188	67.1414	67.0199	66.6998	66.5227	67.189	66.9956	67.4457	66.9993	67.0413	66.8788	67.3584	67.1702	67.6862	67.2894	67.0341	67.1251	67.7355	67.2558	66.8536	67.0744	67.2241	67.1528	66.9244	66.9957	67.3058	67.0553	67.6131	67.0209	66.8788	67.7634	67.1927	67.387	67.4675	67.3159	66.8663	67.6754
py	18.9335	20.0332	19.9802	20.5678	20.9974	21.8791	22.3031	22.5569	23.4318	23.508	23.5865	23.8667	23.9683	24.0146	24.3046	24.5945	24.8755	24.6164	25.2127	24.7202	25.2162	25.3223	25.4521	24.9012	25.4112	24.9668	25.2376	25.4175	25.1929	24.7934	25.3751	25.0989	25.3884	25.1839	25.058	25.2773	24.9095	25.0589	25.1499	24.7276	25.1744	25.3851	24.7923	24.9496	25.1995	25.3587	25.1898	25.4158	25.1413
grs	6.78367	7.54153	7.87297	8.28656	8.62861	8.50854	8.33885	8.19946	7.53402	7.02918	6.99231	6.9	6.53681	6.62471	6.45695	6.32241	5.97808	5.8113	5.64818	5.4312	5.52229	5.42149	5.19089	5.30303	5.27022	4.92021	5.24418	5.41082	5.46796	5.2562	5.36846	5.57388	5.32231	5.35117	5.43586	5.61345	5.52813	5.41541	5.46302	5.31529	5.41348	5.59277	5.18445	5.47347	4.85372	5.13847	5.24926	5.32269	4.9551
spss	2.90246	2.59136	2.54714	2.47606	2.29659	2.43101	2.4818	2.17537	2.5224	2.42042	2.2081	2.26667	2.47606	2.21928	2.21854	2.38332	2.62371	2.38328	2.14359	2.4029	2.26214	2.21488	2.47823	2.43742	2.14837	2.42686	2.22878	2.13761	2.21402	2.21488	2.00067	2.47361	2.21488	2.2408	2.35333	2.18487	2.56663	2.21998	2.33178	2.34401	2.39123	2.14334	2.25989	2.38415	2.55984	2.03537	2.24497	2.39521	2.22813
ab
an
e: enclave
[truncated: 61 more columns]
